# Supplementary material for: Green synthesis of CdS/NixSy nanoparticles as a route towards sustainable and scalable photocatalysts
Source: Royal Society of Chemistry journal article supplement (doi:10.1039/d2gc03361e), 2022-12-02
Supplement: d2gc03361e1.pdf [file d2gc03361e1.pdf]

## Green Synthesis of CdS/Ni<sub>x</sub>S<sub>y</sub> Nanoparticles as a Route Towards Sustainable and Scalable Photocatalysts

John Sakizadeh<sup>1</sup>, Joseph P. Cline<sup>2</sup>, Eva Wolfe<sup>1</sup>, Ryan Thorpe<sup>3</sup>, Mark A. Snyder<sup>1</sup>, Christopher J. Kiely<sup>1,2</sup>, Steven McIntosh<sup>1\*</sup>

<sup>1</sup> Department of Chemical and Biomolecular Engineering, Lehigh University, Bethlehem, PA 18015, USA

<sup>2</sup> Department of Materials Science and Engineering, Lehigh University, Bethlehem, PA 18015, USA

<sup>3</sup> Institute for Functional Materials and Devices, Lehigh University, Bethlehem, PA 18015, USA

\*Corresponding author: mcintosh@lehigh.edu

### Figure List

- Figure S1. UV-vis absorption spectra after adding lead acetate to solutions of 8 mM L-cysteine and 0.05 mg mL<sup>-1</sup> CSE in 100 mM Tris pH 9, Tris pH 7, and pH 5 acetate buffers allowing them to incubate at 37 °C for 2 h. The control for the experiment is L-cysteine and CSE in buffer after incubation but before the addition of 1 mM lead acetate. The increase in the absorbance above that of the control sample following lead acetate addition indicates that CSE is turning over some L-cysteine to produce HS<sup>-</sup>. ..... 3
- Figure S2. UV-vis absorption spectra of 8 mM L-cysteine, 1 mM Ni(NO<sub>3</sub>)<sub>2</sub>, and 0.1 mg mL<sup>-1</sup> CSE in 100 mM pH 5 acetate buffer after incubating at 37 °C for 3 h within (i) a closed atmosphere reaction vessel and (ii) one being open to atmosphere. In the case of the closed atmosphere sample, the vial containing the biomineralization solution was tightly capped and the solution was filled to the top to eliminate any headspace in the container where H<sub>2</sub>S can potentially escape. .... 3
- Figure S3. Time-on-line photocatalytic hydrogen evolution data for biomineralized CdS nanocrystals alone and biomineralized Ni<sub>x</sub>S<sub>y</sub> alone. .... 4
- Figure S4. XEDS mapping of the optimal CdS/Ni<sub>x</sub>S<sub>y</sub> catalyst containing 2.7 wt-% Ni<sub>x</sub>S<sub>y</sub>. .. a) High angle annular dark field image overlaid on the region with elemental maps of b) nickel, c) cadmium, d) oxygen, and e) sulfur. A highly dispersed Ni signal is present throughout the CdS particles. No individual Ni<sub>x</sub>S<sub>y</sub> particles or agglomerates were detected. .... 5
- Figure S5. Monitoring the time dependence of the absorbance at 800 nm after adding Ni<sub>x</sub>S<sub>y</sub> to the photocatalytic testing environment of 100 mM Na<sub>2</sub>S, 100 mM Na<sub>2</sub>SO<sub>3</sub>, 50 mM Tris pH 9 buffer, and 4 mM L-cysteine (red). Adding Ni<sub>x</sub>S<sub>y</sub> to the reactor solvent reduces the absorbance at 800 nm over time, which indicates the dissolution of Ni<sub>x</sub>S<sub>y</sub>. .... 6

Figure S6. Adding biomineralized Ni<sub>x</sub>S<sub>y</sub> to the photocatalytic testing environment of 100 mM Na<sub>2</sub>S, 100 mM Na<sub>2</sub>SO<sub>3</sub>, 50 mM Tris pH 9 buffer, and 4 mM L-cysteine (red) reduces absorbance at 800 nm relative to the case of adding biomineralized Ni<sub>x</sub>S<sub>y</sub> to water (blue) due to dissolution of Ni<sub>x</sub>S<sub>y</sub>. the dotted traces are the solvent without Ni<sub>x</sub>S<sub>y</sub>. ..... 6

Figure S7. Extended time photocatalytic hydrogen evolution over a biomineralized CdS/Ni<sub>x</sub>S<sub>y</sub> catalyst with 2.7 wt-% of Ni<sub>x</sub>S<sub>y</sub>. A degradation in the photocatalytic hydrogen evolution rate is noticeable after about 2 h..... 7

Figure S8. Photocatalytic hydrogen evolution of CdS nanocrystals with 5 wt-% platinum and a 10 min or 30 min photodeposition time..... 8

Figure S9. a) Representative HAADF-STEM image of CdS with 5 wt-% platinum addition, b) high magnification image of platinum particle with a FFT inset fitting to [101] cubic platinum. c) XEDS point spectra showing the presence of S, Cd, and background Cu from the specimen grid, d) The same XEDS point spectra showing the presence of Pt and background Au from the specimen holder. .... 9

**Table List**

Table S1. Photocatalytic hydrogen evolution rates of CdS/Ni<sub>x</sub>S<sub>y</sub> with varying wt-% amounts of Ni<sub>x</sub>S<sub>y</sub>. ..... 7

Table S2. Relevant preparative and catalytic data from previous literature reports of CdS/Ni<sub>x</sub>S<sub>y</sub> photocatalysts. .... 7

Table S3. Photocatalytic hydrogen evolution rates of CdS/Pt with varying amounts of platinum added. .... 8

Table S4. Photocatalytic hydrogen evolution data without normalization, normalized by the surface area, as well as represented by turnover frequency. For the surface area normalization, the surface area of the entire photocatalyst was used. The turnover frequency was calculated by dividing the nonnormalized hydrogen evolution rate by the moles of the added cocatalyst (Ni<sub>x</sub>S<sub>y</sub> or Pt)..... **Error! Bookmark not defined.**

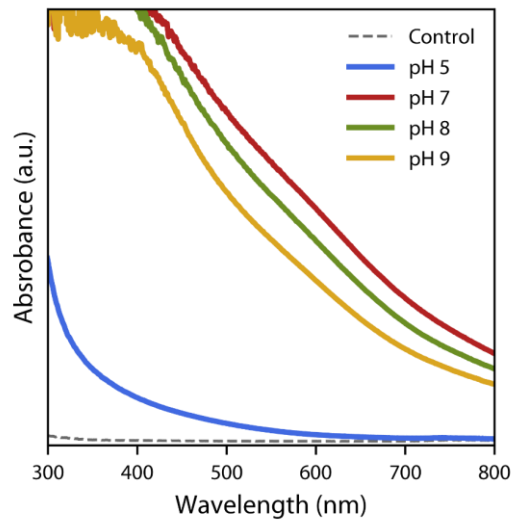

**Figure S1.** UV-vis absorption spectra after adding lead acetate to solutions of 8 mM L-cysteine and 0.05 mg mL<sup>-1</sup> CSE in 100 mM Tris pH 9, Tris pH 7, and pH 5 acetate buffers allowing them to incubate at 37 °C for 2 h. The control for the experiment is L-cysteine and CSE in buffer after incubation but before the addition of 1 mM lead acetate. The increase in the absorbance above that of the control sample following lead acetate addition indicates that CSE is turning over some L-cysteine to produce HS.

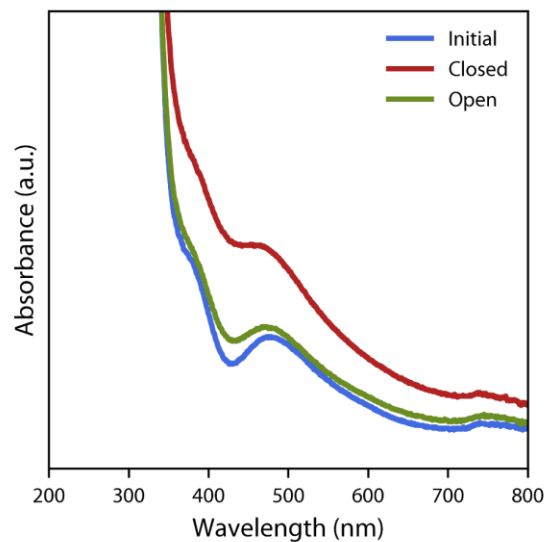

**Figure S2.** UV-vis absorption spectra of 8 mM L-cysteine, 1 mM Ni(NO<sub>3</sub>)<sub>2</sub>, and 0.1 mg mL<sup>-1</sup> CSE in 100 mM pH 5 acetate buffer after incubating at 37 °C for 3 h within (i) a closed atmosphere reaction vessel and (ii) one being open to atmosphere. In the case of the closed atmosphere sample, the vial containing the biomineralization solution was tightly capped and the solution was filled to the top to eliminate any headspace in the container where H<sub>2</sub>S can potentially escape.

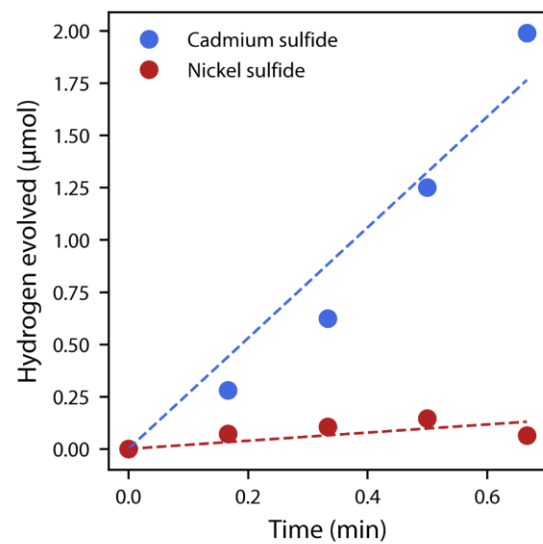

**Figure S3.** Time-on-line photocatalytic hydrogen evolution data for biomineralized CdS nanocrystals alone and biomineralized Ni<sub>x</sub>S<sub>y</sub> alone.

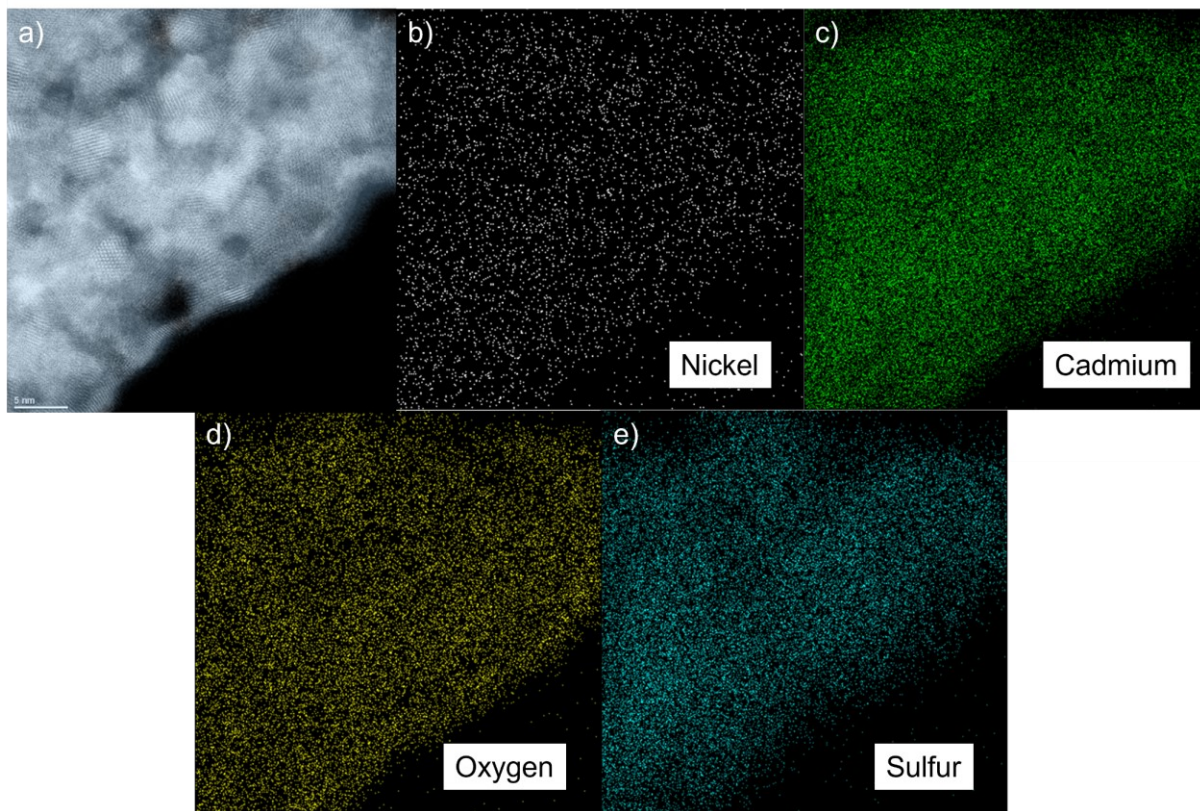

**Figure S4.** XEDS mapping of the optimal CdS/Ni<sub>x</sub>S<sub>y</sub> catalyst containing 2.7 wt-% Ni<sub>x</sub>S<sub>y</sub>. .. a) High angle annular dark field image overlaid on the region with elemental maps of b) nickel, c) cadmium, d) oxygen, and e) sulfur. A highly dispersed Ni signal is present throughout the CdS particles. No individual Ni<sub>x</sub>S<sub>y</sub> particles or agglomerates were detected.

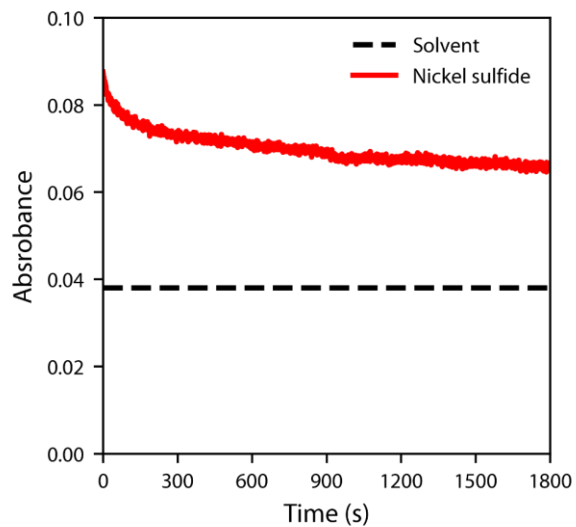

**Figure S5.** Monitoring the time dependence of the absorbance at 800 nm after adding  $\text{Ni}_x\text{S}_y$  to the photocatalytic testing environment of 100 mM  $\text{Na}_2\text{S}$ , 100 mM  $\text{Na}_2\text{SO}_3$ , 50 mM Tris pH 9 buffer, and 4 mM L-cysteine (red). Adding  $\text{Ni}_x\text{S}_y$  to the reactor solvent reduces the absorbance at 800 nm over time, which indicates the dissolution of  $\text{Ni}_x\text{S}_y$ .

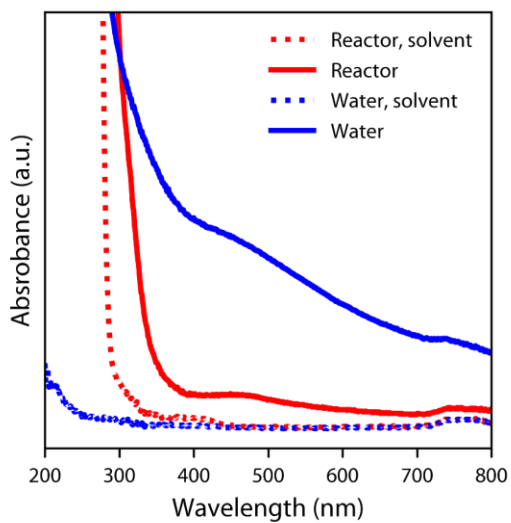

**Figure S6.** Adding biomineralized  $\text{Ni}_x\text{S}_y$  to the photocatalytic testing environment of 100 mM  $\text{Na}_2\text{S}$ , 100 mM  $\text{Na}_2\text{SO}_3$ , 50 mM Tris pH 9 buffer, and 4 mM L-cysteine (red) reduces absorbance at 800 nm relative to the case of adding biomineralized  $\text{Ni}_x\text{S}_y$  to water (blue) due to dissolution of  $\text{Ni}_x\text{S}_y$ . the dotted traces are the solvent without  $\text{Ni}_x\text{S}_y$ .

**Table S1.** Photocatalytic hydrogen evolution rates of CdS/Ni<sub>x</sub>S<sub>y</sub> with varying wt-% amounts of Ni<sub>x</sub>S<sub>y</sub>.

| Ni <sub>x</sub> S <sub>y</sub> (wt-%) | Photocatalytic hydrogen evolution rate (μmol h <sup>-1</sup> g <sup>-1</sup> ) |
|---------------------------------------|--------------------------------------------------------------------------------|
| 0.0%                                  | 1,400                                                                          |
| 0.2%                                  | 3,100                                                                          |
| 0.9%                                  | 7,800                                                                          |
| 1.8%                                  | 9,600                                                                          |
| 2.7%                                  | 10,500                                                                         |
| 3.5%                                  | 7,700                                                                          |

**Table S2.** Relevant preparative and catalytic data from previous literature reports of CdS/Ni<sub>x</sub>S<sub>y</sub> photocatalysts.

| Reference                        | Material                           | Cadmium sulfide synthesis conditions                | Nickel sulfide synthesis conditions                 | Photocatalytic hydrogen evolution rate (μmol h <sup>-1</sup> g <sup>-1</sup> ) |
|----------------------------------|------------------------------------|-----------------------------------------------------|-----------------------------------------------------|--------------------------------------------------------------------------------|
| Liu et al. (2016) <sup>1</sup>   | CdS/Ni <sub>x</sub> S <sub>y</sub> | Hydrothermal, 180 °C for 24 h                       | Reaction of Ni <sup>2+</sup> with Na <sub>2</sub> S | 25,000                                                                         |
| Zhou et al. (2017) <sup>2</sup>  | CdS/NiS                            | Hydrothermal, 200 °C for 24 h                       | Hydrothermal, 200 °C for 24 h                       | 25,000                                                                         |
| Chen et al. (2020) <sup>3</sup>  | CdS/NiS                            | Solvothermal, 160 °C for 24 h                       | Hydrothermal, 120 °C for 12 h                       | 400,000                                                                        |
| Xu et al. (2017) <sup>4</sup>    | CdS/Ni <sub>x</sub> S <sub>y</sub> | Reaction of Cd <sup>2+</sup> with Na <sub>2</sub> S | Reaction of Ni <sup>2+</sup> with Na <sub>2</sub> S | 25,000                                                                         |
| Zhang et al. (2018) <sup>5</sup> | CdS/NiS                            | Hydrothermal, 180 °C for 4 h                        | Hydrothermal, 180 °C for 4 h                        | 30,000                                                                         |
| Li et al. (2018) <sup>6</sup>    | CdS/NiS                            | Solvothermal, 180 °C for 24 h                       | Solvothermal, 180 °C for 12 h                       | 1,500                                                                          |
| Meng et al. (2018) <sup>7</sup>  | CdS/NiS                            | Solvothermal, 160 °C for 24 h                       | Hydrothermal, 160 °C for 24 h                       | 6,000                                                                          |

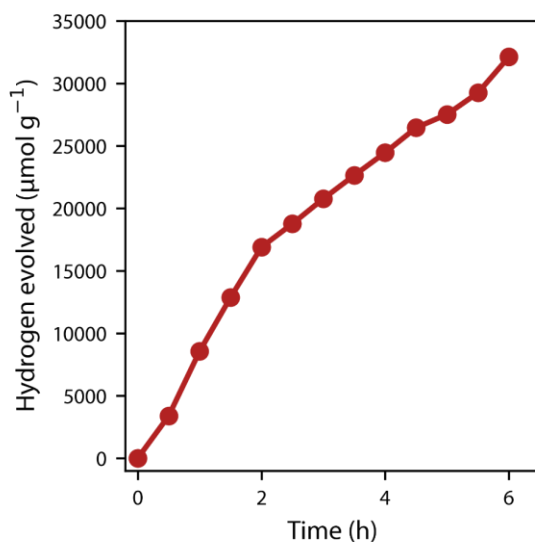**Figure S7.** Extended time photocatalytic hydrogen evolution over a biominedralized CdS/Ni<sub>x</sub>S<sub>y</sub> catalyst with 2.7 wt-% of Ni<sub>x</sub>S<sub>y</sub>.

A degradation in the photocatalytic hydrogen evolution rate is noticeable after about 2 h.

**Table S3.** Photocatalytic hydrogen evolution rates of CdS/Pt with varying amounts of platinum added.

| Platinum wt-% | Photocatalytic hydrogen evolution rate ( $\mu\text{mol h}^{-1} \text{g}^{-1}$ ) |
|---------------|---------------------------------------------------------------------------------|
| 0%            | 1,400                                                                           |
| 1%            | 2,200                                                                           |
| 5%            | 3,400                                                                           |
| 10%           | 3,000                                                                           |

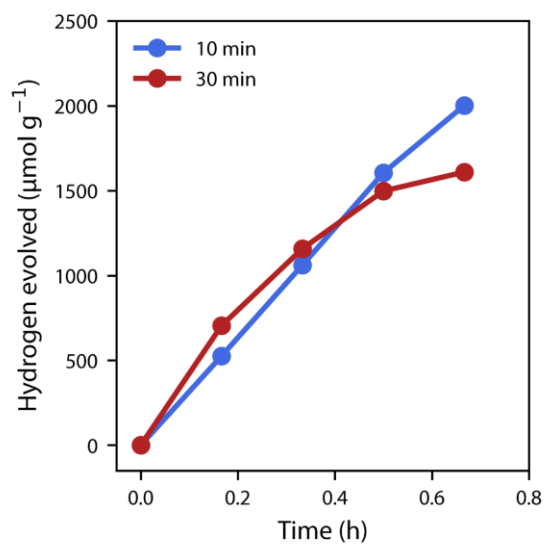

**Figure S8.** Photocatalytic hydrogen evolution of CdS nanocrystals with 5 wt-% platinum and a 10 min or 30 min photodeposition time.



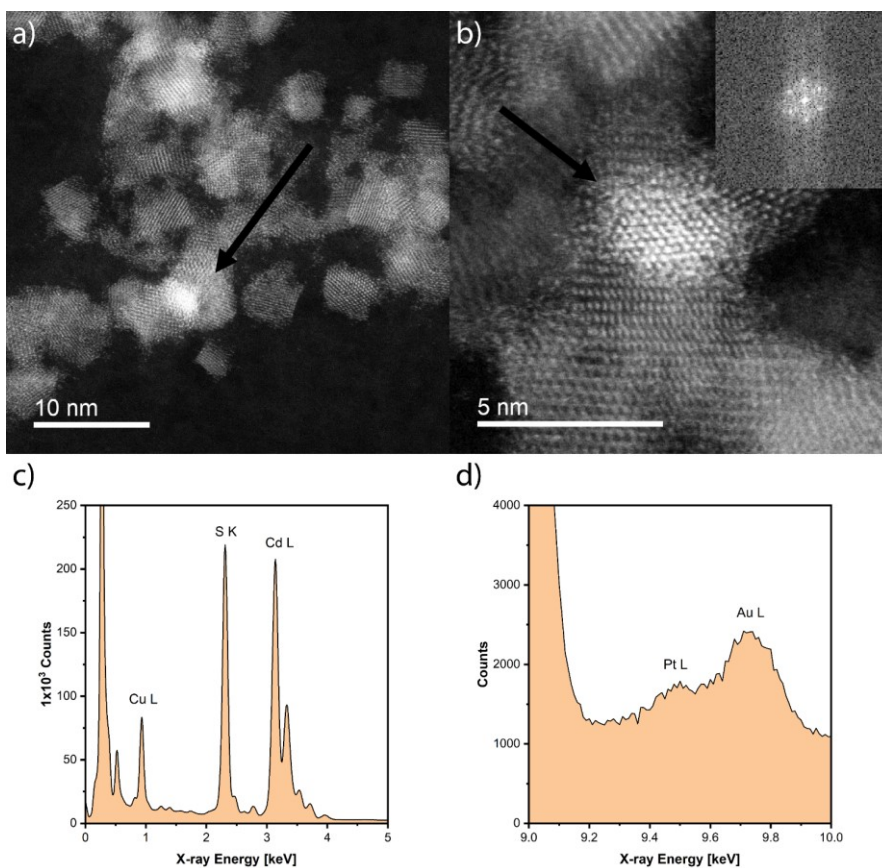

**Figure S9.** a) Representative HAADF-STEM image of CdS with 5 wt-% platinum addition, b) high magnification image of platinum particle with a FFT inset fitting to [101] cubic platinum. c) XEDS point spectra showing the presence of S, Cd, and background Cu from the specimen grid, d) The same XEDS point spectra showing the presence of Pt and background Au from the specimen holder.

**Table S4.** Photocatalytic hydrogen evolution data without normalization, normalized by the surface area, as well as represented by turnover frequency. For the surface area normalization, the surface area of the entire photocatalyst was used. The turnover frequency was calculated by dividing the non-normalized hydrogen evolution rate by the moles of the added cocatalyst (*i.e.*, Ni<sub>x</sub>S<sub>y</sub> or Pt).

| Sample                                        | Photocatalyst mass (mg) | Photocatalyst surface area ( $\times 10^9 \text{ m}^2$ ) | H <sub>2</sub> evolution rate ( $\mu\text{mol h}^{-1}$ ) | Surface area normalized H <sub>2</sub> evolution rate ( $\mu\text{mol h}^{-1} \text{ m}^{-2}$ ) | TOF ( $\text{s}^{-1}$ ) |
|-----------------------------------------------|-------------------------|----------------------------------------------------------|----------------------------------------------------------|-------------------------------------------------------------------------------------------------|-------------------------|
| CdS                                           | 2.1 $\pm$ 0.7           | 1.3 $\pm$ 0.5                                            | 3.2 $\pm$ 0.5                                            | 260 $\pm$ 60                                                                                    | -                       |
| CdS + 5 wt-% Pt                               | 2.2 $\pm$ 0.2           | 1.3 $\pm$ 0.1                                            | 6.9 $\pm$ 0.6                                            | 523 $\pm$ 9                                                                                     | 0.0037 $\pm$ 0.0003     |
| CdS + 2.7 wt-% Ni <sub>x</sub> S <sub>y</sub> | 2.2 $\pm$ 0.2           | 1.4 $\pm$ 0.2                                            | 26 $\pm$ 4                                               | 1900 $\pm$ 90                                                                                   | 0.014 $\pm$ 0.002       |

## References

- 1 M. Liu, Y. Chen, J. Su, J. Shi, X. Wang and L. Guo, *Nat. Energy*, 2016, **1**, 1-8.
- 2 X. Zhou, H. Sun, H. Zhang and W. Tu, *Int. J. Hydrogen Energy*, 2017, **42**, 11199-11205.
- 3 Z. Chen, C. Cheng, F. Xing and C. Huang, *New J. Chem.*, 2020, **44**, 19083-19090.
- 4 Y. Xu, W. Tu, S. Yin, M. Kraft, Q. Zhang and R. Xu, *Dalton Transactions*, 2017, **46**, 10650-10656.
- 5 Y. Zhang, Z. Peng, S. Guan and X. Fu, *Appl. Catal. B-Environ.*, 2018, **224**, 1000-1008.
- 6 C. Li, H. Wang, S. B. Naghadeh, J. Z. Zhang and P. Fang, *Appl. Catal. B-Environ.*, 2018, **227**, 229-239.
- 7 S. Meng, Y. Cui, H. Wang, X. Zheng, X. Fu and S. Chen, *Dalton Transactions*, 2018, **47**, 12671-12683.
